## The effects of habits on motor skill learning

Nicola J. Popp<sup>1\*</sup>, Atsushi Yokoi<sup>2,3</sup>, Paul Gribble<sup>1,4,5</sup> & Jörn Diedrichsen<sup>1,6,7</sup>

<sup>1</sup>The Brain and Mind Institute, University of Western Ontario, Canada,

<sup>2</sup>Graduate School of Frontier Biosciences, Osaka University, Japan,

<sup>3</sup>Center for Information and Neural Networks (CiNet), NICT, Japan,

<sup>4</sup>Department of Physiology & Pharmacology, University of Western Ontario, Canada,

<sup>5</sup>Haskins Laboratories, USA,

<sup>6</sup>Department of Statistical and Actuarial Sciences, University of Western Ontario, Canada,

<sup>7</sup>Department of Computer Science, University of Western Ontario, Canada

### Acknowledgments

This work is supported by a James S. McDonnell Foundation Scholar award, a Natural Sciences and Engineering Council of Canada (NSERC) Discovery Grant (RGPIN-2016-04890) and the Canada First Research Excellence Fund (BrainsCAN) to J.D., a NSERC Grant (RGPIN 238338), a Canadian Institutes of Health Research Grant (PJT-153447), and a National Institute of Child Health and Human Development Grant (R01 HD075740) to P.G.. We thank Aaron L. Wong for helpful comments on earlier versions of this manuscript.

### Correspondence address

Jörn Diedrichsen, The Brain and Mind Institute, University of Western Ontario, London, Canada. [jdiedric@uwo.ca](mailto:jdiedric@uwo.ca)

### Author contributions

N.J.P. and J.D. designed the experiment. N.J.P, A.Y. and J.D. programmed the experiment. N.J.P collected the data and analyzed the data together with J.D.. N.J.P., J.D., and P.G. wrote the manuscript.

### Conflict of interest

The authors declare no conflict of interest.

## Abstract

1 Skill learning involves the formation of stable motor patterns. In musical and athletic  
2 training, however, the formation of bad habits can impede the attainment of high levels of  
3 performance. We developed a novel experimental paradigm to induce a specific motor  
4 habit in a sequence production task and investigated how it affected subsequent  
5 optimization over a 3-week training period. Participants initially practiced small segments  
6 of 2 to 3 finger movements, which were then combined to form longer sequences. This  
7 initial training induced a persistent chunking behavior, with shorter intervals between  
8 presses within a chunk and longer presses at chunk boundaries. By aligning these chunks  
9 with biomechanically easy or difficult transitions, we were able to induce chunking habits  
10 that were either beneficial or detrimental to performance. We found that participants  
11 overcame detrimental habits using two kinds of optimization processes. Failure to change  
12 detrimental chunk structures predicted lower levels of final performance.  
13

## Introduction

14 Humans are capable of developing astonishing feats of motor skill, such as performing  
15 athletics, playing music and dancing. But what does it take to become a motor expert?  
16 The first obvious factor is practice: it is often estimated that 10,000 hours of training are  
17 necessary to develop high-level motor skills<sup>1,2</sup>. Perhaps the motor system simply needs  
18 to acquire a large amount of information over a long period of time to optimize the  
19 muscle commands that are necessary to achieve skilled movement. According to this  
20 view, given enough practice, motor expertise should automatically emerge<sup>1,2</sup>.  
21

22 Simply practicing for many hours will not automatically lead to expert  
23 performance, however. There are numerous examples in which motor skill acquisition is  
24 slow or fails altogether<sup>3</sup>. This is commonly attributed to the formation of habits<sup>4,5</sup>:  
25 automatic and highly entrenched behavioral patterns that resist change through  
26 retraining<sup>4-14</sup>. While the automatic nature of habits can be beneficial to performance by  
27 reducing cognitive load<sup>3,15,16</sup>, the rigid nature of habits can potentially be detrimental to  
28 improvement<sup>4-6</sup>. Despite being a highly relevant phenomenon across many domains,  
29 the influence of motor habits on skill learning has not been investigated in a controlled

30 laboratory study. How long does it take for a motor habit to become ingrained? How  
31 stable are motor habits over time? Can a bad habit be overcome with practice?

32 To investigate habit formation in motor skill learning, we introduce a novel  
33 experimental paradigm that enables us to induce specific motor habits and to test  
34 whether and how participants can overcome these habits with subsequent practice. As  
35 an experimental model of motor skill acquisition, we used the discrete sequence  
36 production task (DSP), in which participants perform a series of single finger presses as  
37 fast as possible while having full knowledge of the sequence<sup>17,18</sup>. Learning in this task  
38 depends on both cognitive and motor processes<sup>19,20</sup>. Initial performance relies strongly  
39 on forming a declarative memory of the sequence and can, therefore, be sculpted  
40 through explicit instructions<sup>21-24</sup>. Later stages of learning increasingly rely on the  
41 optimization of execution-related processes that are involved in producing the fast and  
42 co-articulated finger presses. As such, the DSP task provides a model of the rich  
43 interplay between cognitive and motor processes involved in skill acquisition.

44 An important cognitive influence on sequence performance is “chunking” – the  
45 process by which participants separate a long sequence into smaller subsets<sup>22,25</sup>.  
46 Chunking has been shown to aid memorization and performance by reducing memory  
47 capacity demands<sup>25-29</sup>. The structure of the declarative memory representation of a  
48 sequence may then constrain subsequent motor optimization processes<sup>30,31</sup>; it has been  
49 suggested that sequential movements may be optimized within a chunk, but not across  
50 chunk boundaries<sup>32</sup>. Thus, we hypothesized that depending on the way a long  
51 sequence is cognitively chunked, the resulting habit could either facilitate or impede  
52 subsequent skill learning. Hence, we use chunking as a tool to impose habits onto  
53 participants’ behavior and investigate how these subsequently change with practice.

54 We trained 3 groups of participants to perform the same set of 7 sequences,  
55 each consisting of 11 isometric keypresses. Training occurred on 15 separate days,  
56 spread over 3 weeks. The experiment was designed to induce a specific chunk  
57 structure at the beginning of training, and then test how this chunk structure affected  
58 subsequent improvement through practice (optimization). In the induction phase (Fig.  
59 1a), participants (groups 1 & 2) first practiced small 2-3 digit chunks and then learned

60 the sequences, each of which consisted of four of the pre-trained chunks. The two  
61 groups differed in how the sequences were broken up into chunks (Fig. 1c & suppl.  
62 Table 2). We imposed chunk structures that were designed to be either aligned or  
63 misaligned with biomechanically easy or difficult transitions within the sequence and  
64 therefore were predicted to be beneficial or detrimental to subsequent movement  
65 speed. To test for patterns of spontaneous chunking, the third (control) group was  
66 trained on the same sequences but we did not impose a specific chunk structure during  
67 the initial part of training.

68 In the subsequent optimization phase (Fig. 1a), participants were instructed to  
69 improve their performance through practice. During this phase, we did not make any  
70 further mention of chunks (see Methods). Because the sequences were identical for all  
71 groups, we could make strong inferences about whether performance during this  
72 subsequent training was dictated by biomechanical demands (which were identical  
73 across groups) or whether optimization was affected by the chunk structure imposed  
74 during the induction phase. Furthermore, using a Bayesian model, we estimated  
75 changes in chunk structure that were independent of performance changes. This  
76 allowed us to investigate three questions: First, can explicit instructions at the beginning  
77 of training lead to stable motor habits? Second, do particular ways of chunking impede  
78 or enhance participants' ability to reach skilled performance? Finally, what are the  
79 optimization processes that allow participants to overcome "bad" habits through  
80 practice?

## 81 **Results**

82 Over 15 days we trained 32 participants to produce sequences of 11 isometric  
83 keypresses from memory on a keyboard-like device. Participants were rewarded with  
84 pleasant sounds and points for executing the sequences as fast as possible while  
85 keeping the proportion of incorrect key presses in each block of trials below 15%.

86 We manipulated how participants memorized the sequences by splitting the  
87 sequences up into several chunks, each composed of 2-3 keypresses. The idea was to  
88 test whether the different ways of chunking (hereafter "chunk structures") imposed in the  
89 induction phase (Fig. 1a) would affect how participants were able to optimize their

90 performance in the subsequent two weeks of training. On the first day of the  
91 experiment, we trained participants on eleven different 2-3 press chunks. Participants  
92 learned to produce each chunk in response to a visually presented letter. For example,  
93 the letter A corresponded to the chunk “3,2,1” (middle finger, index finger, thumb). At  
94 the end of the first day, participants could reliably produce the chunks from memory with  
95 an average accuracy of 92.7%. On days 2-4, we combined these smaller chunks to  
96 form 7 different 11-press sequences. Each sequence was also associated with a visual  
97 cue in the form of a single character symbol (e.g. \$ or %). At the end of day 4,  
98 participants were able to recall all sequences from memory using the sequence cue with  
99 an accuracy of 92.5%. In the optimization phase (days 5-14), participants then tried to  
100 improve their performance by decreasing their movement time (MT - time elapsed from  
101 first to last press of the sequence). In this phase, no further instructions in terms of  
102 chunks were given.

103 All participants trained on the same 7 sequences, but we imposed different chunk  
104 structures, depending on the group that the participants were assigned to. This allowed  
105 us to dissociate the effects of the initial instruction from chunking that emerges from the  
106 biomechanical requirements of the sequence. To compare the formation of “good” and  
107 “bad” habits, we designed chunk structures that were predicted to be either beneficial or  
108 detrimental to performance. These predictions were based on a separate experiment  
109 (see Methods), in which we trained 7 participants on all possible 2 and 3 keypress  
110 combinations over the course of 3 days and measured how fast they could execute  
111 these short sequences. The results showed that the transition between two adjacent  
112 fingers can be performed faster than two repeated presses of the same finger ( $t_{(6)} =$   
113 13.965,  $p = 8.404e-06$ ; see Fig. 1b). Given that the 2-3 press sequences hardly taxed  
114 the cognitive system, these results can be taken as a characterization of the  
115 biomechanical constraints of our task.

116 We used these results to design two different ways of separating the sequences  
117 into chunks. In one case, chunk boundaries were **aligned** with digit transitions that were  
118 performed more slowly (as measured in the independent dataset) – i.e. they were  
119 preferentially placed between digit repetitions (Fig. 1c). The time that is required to

120 perform these difficult finger transition can therefore simultaneously be used to recall a  
121 next chunk, which should benefit overall performance. In the **misaligned** chunk  
122 structure, chunk boundaries were placed at digit transitions that can be performed  
123 quickly, thereby breaking up transitions between adjacent fingers or runs (Fig. 1c).  
124 Participants would, therefore, have to slow down their performance at these fast  
125 transitions to recall the next chunk, which we predicted should hurt their overall speed.  
126 Each participant learned 3 of the 7 sequences with a misaligned chunk structure and 3  
127 sequences with an aligned chunk structure, with the assignment counterbalanced  
128 across groups. For the last remaining sequence, both ways of chunking were predicted  
129 to be equally fast, as both possible chunk structures were relatively well aligned with the  
130 biomechanical requirements (“neutral chunk structure”, Fig. 1d & Supp. Table 1).

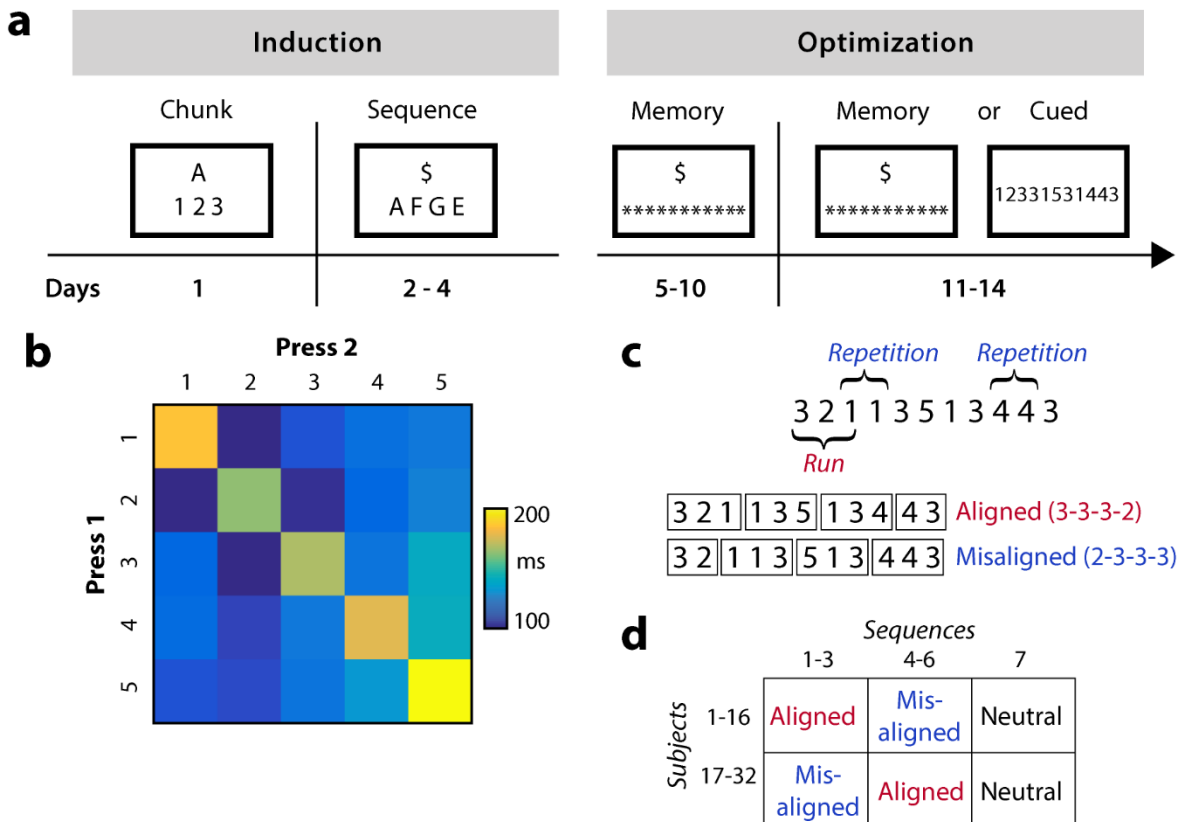

**Figure 1. Experimental procedure.** (a) Experimental timeline depicting the training at each stage. In the induction phase participants memorized chunks and sequences. In the optimization phase participants trained to perform these sequences as fast as possible from memory. In the last week of training, half of the participants were directly cued with the sequence, while the other half performed the sequences from memory. (b) Data from an independent dataset, in which participants performed all possible combinations of 2 and 3-digit transitions. Matrix indicates the median inter-press interval (IPI) to produce the transition between pairs of keypresses. (c) Top: Example sequence containing a 3-digit run and two digit repetitions. Bottom: The sequence was separated using two possible chunk structures. In the aligned structure, the chunk boundaries fell between repetitions, in the misaligned structure the chunk boundary broke up the run. (d) The assignment of chunk structures to sequences was counterbalanced between participants.

### 131 **Chunk induction induces stable motor habits**

132 To assess whether the experimentally imposed chunk structure influenced participants'  
133 motor behavior, we examined inter-press time intervals (IPIs). An increased IPI is  
134 commonly taken as a sign of the beginning of a new chunk, as the cognitive processes  
135 (memory recall, action selection) involved in switching from one chunk to another  
136 require additional time<sup>24,33</sup>. Hence, we would expect our participants to exhibit shorter  
137 IPIs between keypresses that belonged to one of the chunks imposed during day 1  
138 (within-chunk IPIs) and larger IPIs for the boundaries between chunks (between-chunk  
139 IPIs). Consistent with this idea, we found significantly longer between-chunk IPIs  
140 compared to within-chunk IPIs in the first four days of training (Fig. 2a: days 2-4:  $t_{(31)} =$   
141 7.728,  $p = 5.098e-09$ ).

142 After day 4, we ceased to cue sequences using the alphabetic letters associated  
143 with the chunks. Instead, participants had to recall the sequences from memory using  
144 only the symbolic sequence cues (e.g. "\$"). From this point forward, no further reference  
145 was made to the chunk structure imposed in the induction phase. Across days 5-10, the  
146 difference between the within- and between-chunk IPIs remained stable;  $t_{(15)} = 5.985$ ,  $p$   
147  $= 2.351e-08$  (Fig. 2a). Importantly, this difference cannot be attributed the  
148 biomechanical difficulty of the finger transitions. The within-chunk IPIs for one group  
149 were the between-chunk IPIs for the other group and vice versa; IPIs that were within-  
150 chunk for all participants (e.g. the first and last IPI of a sequence) were excluded from  
151 this analysis. In summary, even though after day 4, sequences were cued only using a  
152 single symbol, participants persisted in performing the sequences in a manner  
153 consistent with the chunk structures imposed early in training.



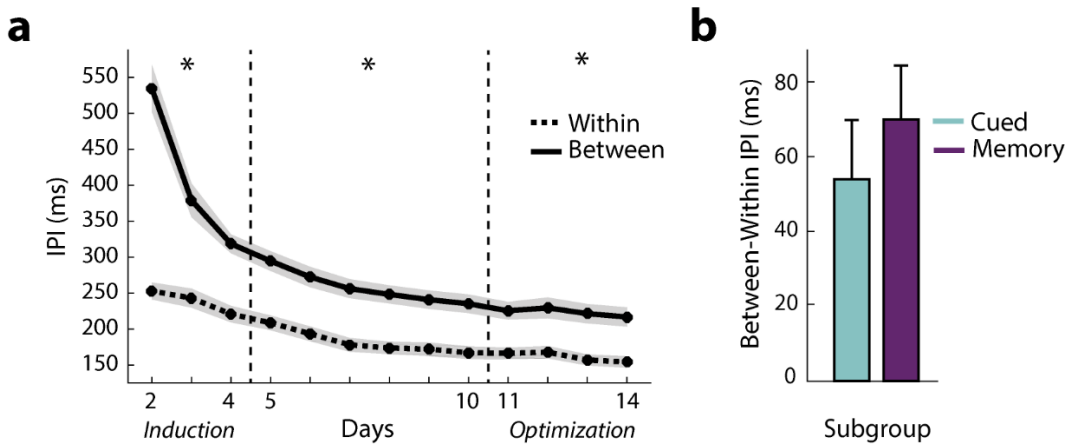

**Figure 2. Within vs. between inter-press intervals (IPIs).** (a) A stable difference between within and between IPIs can be observed over the course of the experiment. Asterisks indicate significant differences in the corresponding week (separated by dashed lines). (b) Average between – within IPIs in the last week of training, split by whether participants had to recall the sequences from memory or were cued with the sequence numbers. Error bars denote between-subject standard error.

154 In the last four days of training (days 11-14) we tested whether the persistence of  
155 the instructed chunk structure reflected a motor habit or whether it reflected memory  
156 recall. We split each experimental group into two subgroups: half of the participants  
157 continued to perform the sequences from memory, while the other half were cued using  
158 the numbers (Fig. 1a) that indicated the necessary keypresses, therefore removing any  
159 memory demands. Both the memory ( $t_{(15)} = 4.8651$ ,  $p = 2.0591e-4$ -Fig. 2b) and the cued  
160 subgroup ( $t_{(15)} = 3.403$ ,  $p = 0.004$ ) showed a significant difference between the within-  
161 and between-chunk IPIs and there was no reliable difference between the two  
162 subgroups in this effect ( $t_{(30)} = -0.749$ ,  $p = 0.460$ ). Thus, removing the requirement for  
163 memory recall in the last four days of training did not abolish chunking. Because none of  
164 the subsequent analyses showed any significant difference between the two subgroups,  
165 we will report their combined results for the remainder of the article. Overall, these  
166 results suggest the explicit chunk training early in learning established a stable motor  
167 habit that outlasted 10 days of subsequent practice.

## 168 **Changes in misaligned vs. aligned chunk structure**

169 Next, we examined whether participants retained the chunk structure to the same  
170 degree for aligned and misaligned chunking patterns. We split the IPI data by whether  
171 the intervals were taken from the sequences that were instructed with the aligned or  
172 misaligned chunk structure. While the difference between the within- and between-  
173 chunk IPIs for the instructed aligned chunk structure was stable over the entire 3 weeks  
174 of training, the difference for the instructed misaligned structure disappeared in the last  
175 four days of training (Fig. 3a). The three-way interaction between day  $x$  within/between  
176  $x$  instruction (aligned or misaligned) was significant ( $F_{(24,744)} = 12.493$ ,  $p < 1e-16$ ). Thus,  
177 in the last four days of training participants seemed to diverge from the misaligned  
178 chunk structure while consistently keeping the aligned chunk structure.

## 179 **Influence of chunking instruction on performance**

180 We predicted that chunking instructions that are misaligned with biomechanical  
181 constraints would hinder performance. Indeed, in the first two weeks of training (days 2-  
182 10) the sequences that were instructed with the misaligned chunk structure were  
183 performed slower than the sequences instructed with the aligned chunk structure (one-  
184 sample t-test of differences in performance: days 2-4:  $t_{(31)} = 2.693$ ,  $p = 0.006$ , days 5-10:  
185  $t_{(31)} = 2.313$ ,  $p = 0.014$ ; Fig. 3b). Hence, we were able to induce differences in  
186 performance, purely based on our training instructions. This is an important finding  
187 because it shows that we were not only able to manipulate *how* participants performed  
188 a sequence but also *how well* they could perform it.

189 Interestingly, the difference in performance between the sequences that were  
190 instructed with the aligned compared to the misaligned chunk structure was no longer  
191 significant in the last four days of training (days 10-14:  $t_{(31)} = 0.764$ ,  $p = 0.225$ ; Fig. 3b).  
192 This coincided with the fact that in the last four days, participants no longer showed a  
193 systematic difference between the within- and between-chunk IPIs for the sequences  
194 that were instructed with the misaligned chunk structure. This suggests that participants  
195 were able to overcome the induced performance deficit by abandoning the non-optimal  
196 chunk structure.

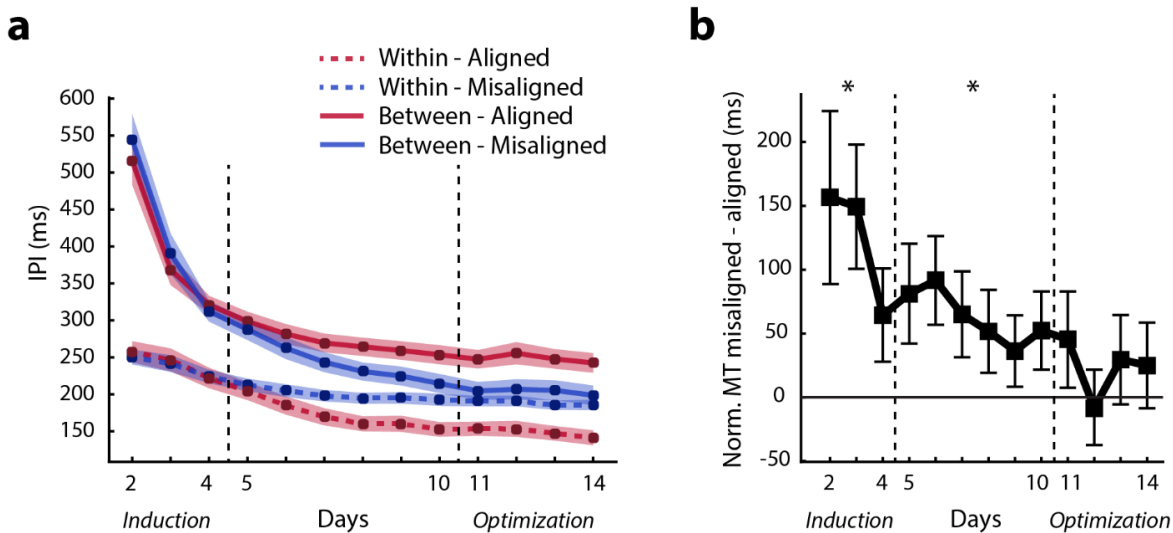

**Figure 3. Change in chunk structure and performance for aligned and misaligned instructed sequences. (a)** Within- or between-chunk IPIs over days, separated by whether they were in the aligned or misaligned instructed sequences. **(b)** Differences in movement time (MT) between sequences instructed with an aligned and misaligned way of chunking. Asterisk indicates a significant difference from 0 (no difference). Error bars denote between-subject standard error.

### 197 Tracking changes in chunking

198 The IPI analysis presented in Figure 3a shows that participants changed their chunk  
199 structure more for the misaligned than for the aligned chunk structure. What we cannot  
200 discern from this analysis, however, is how participants restructured their chunking  
201 behavior and whether they completely abandoned the misaligned chunk structure. To  
202 get a clearer understanding of how participants changed their chunk structure, we used  
203 a Bayesian model that allows us to estimate the probability of each possible chunk  
204 structure on a trial-by-trial basis<sup>34</sup>. The state in this Hidden Markov Model indicated  
205 which of the 1023 possible chunk structures was present on each trial. Using the  
206 expectation-maximization (EM) algorithm<sup>35,36</sup>, we simultaneously estimated the 9 free  
207 parameters of the model (for details see Methods), as well as the posterior probability  
208 for each possible chunk structure on each trial. We accounted for the effects of  
209 biomechanical difficulty by regressing out an average IPI pattern of each possible finger

210 transition from individual IPIs before modeling. Importantly, our version of the algorithm  
211 included a model for separate learning-related changes to the within- and between-  
212 chunk intervals (Fig. 4a). Our method, therefore, allowed us to estimate participants'  
213 chunk structure independent of the overall speed of performance. We confirmed this  
214 independence using simulated data (see methods).

215           Figure 4b shows an example of an individual participant and sequence. The  
216 participant chunked the sequence according to the initial instructions at first, then  
217 inserted 1 or 2 additional chunk boundaries, and at the end of training performed the  
218 sequence as a single chunk. To summarize these changes across participants and  
219 sequences, we used a distance measure that characterizes differences between chunk  
220 structures. To compute this distance, we simply counted the number of chunk  
221 boundaries that differed between the two chunk structures – i.e. the number of chunks  
222 that needed to be split or merged to transform one chunk structure into the other (Fig.  
223 4b - distance).

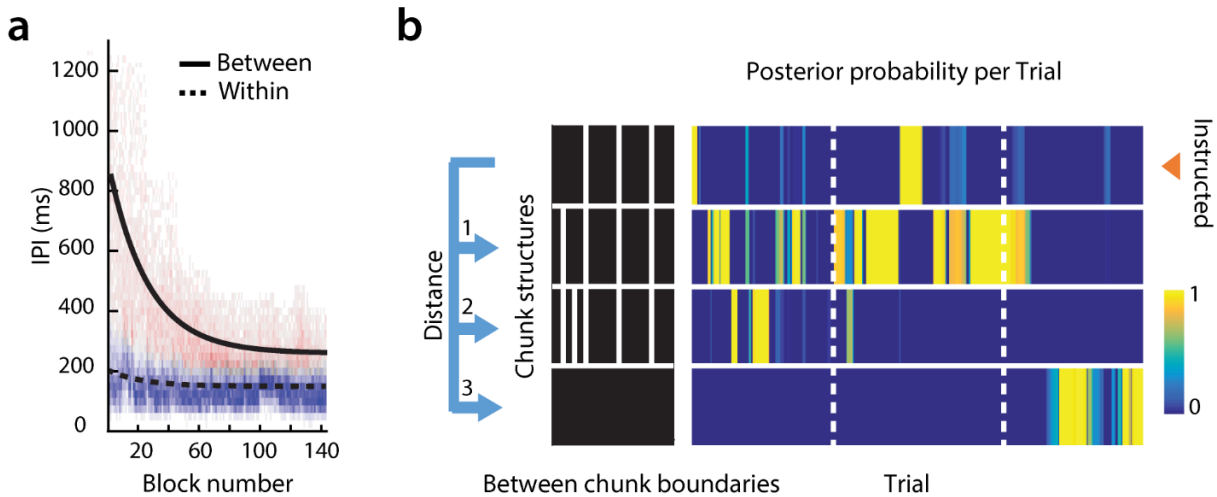

**Figure 4. Probabilistic chunking model fitted to example participant data. (a)**

*The change of within- and between-chunk IPIs were modeled using two separate exponential functions across training. The density plot shows individual IPIs, with the color indicating the probability to be a between- (pink) or within-chunk interval (blue).*

**(b)** *Example of the posterior probability of 4 possible chunk structures (out of 1023) for a single participant and a single sequence over the course of the experiment. The black box indicates chunk structures with white lines referring to chunk boundaries within the 11-press sequence (max. 10 boundaries). The colored box indicates the posterior probability of a given chunk structure for each trial - with yellow indicating higher probabilities. The dashed vertical lines indicate the boundaries between training weeks. The first row refers to the instructed chunk structure. The 2<sup>nd</sup>-3<sup>rd</sup> rows differ from the instructed structure by an additional chunk boundary each. In the last row the sequence is performed as a single chunk. The distance between two structures indicates how many chunk boundaries have changed.*

## 224 **Movement towards a single chunk structure**

225 To visualize learning-related changes in chunking, we projected the estimated chunk  
 226 structure into a 2-dimensional space (Fig. 5a). On the horizontal axis, we plotted the  
 227 expected distance of participants' chunk structure to the single-chunk structure. Given  
 228 the nature of our distance metric, this measure simply counts the number of chunk

229 boundaries. On the vertical axis, we plotted how close the estimated chunk structure  
230 was to the aligned and misaligned chunk structure.

231 Previous literature has suggested that participants group smaller chunks together  
232 with training, resulting in fewer chunk boundaries<sup>25,28,32,37-39</sup>. To test this idea, we  
233 estimated the expected distance to a single chunk for each participant averaged across  
234 sequences (the neutral sequence was excluded). Interestingly, on the 2<sup>nd</sup> day of  
235 practice participants separated sequences into more chunks than the 3 chunks we  
236 instructed (Fig. 5a,  $t_{(31)} = 4.224$ ,  $p = 0.0002$ ). This tendency continued on day 3, where  
237 participants tended to subdivide the sequences into even smaller chunks compared to  
238 the day before (Fig. 5b; day 2 vs. 3:  $t_{(31)} = 2.023$ ,  $p = 0.052$ ). After day three the  
239 estimated number of chunk boundaries decreased as shown by a significant effect of  
240 day in a repeated measures ANOVA ( $F_{(11,341)} = 11.710$ ,  $p < 1e-16$ ). However, even in  
241 the last phase of training, participants performed the sequences with an average of 2.9  
242 chunk boundaries (we instructed 3 chunk boundaries). Thus, while there was a clear  
243 tendency towards merging chunks, participants did not perform the sequence as a  
244 single chunk, even after 3 weeks of practice.

#### 245 **Participants abandoned the misaligned chunk structure to a greater degree**

246 Next, we probed how much participants diverged from our initial instructions. Our  
247 analysis showed that participants slowly changed their chunk structure for both aligned  
248 and misaligned instructed sequences with training. The average distance to the  
249 instructed chunk structure increased systematically over time (repeated measures  
250 ANOVA, effect of day,  $F_{(12,372)} = 7.055$ ,  $p < 1e-16$ , Fig. 5c). Thus, even the aligned  
251 chunk structure underwent some changes with practice.

252 Consistent with our analysis of the IPIs (Fig. 3a), we observed that participants  
253 abandoned the misaligned chunk structure to a greater degree than the aligned chunk  
254 structure (Day x Instruction interaction:  $F_{(12, 372)} = 5.610$ ,  $p < 1e-16$ ). The misaligned  
255 instructed sequences showed a larger distance to the instructed chunk structure than  
256 the aligned instructed sequences in the last four days of training:  $t_{(31)} = 2.294$ ,  $p = 0.029$   
257 (Fig. 5c). Additionally, we found a significant Day x Instruction interaction ( $F_{(12, 372)} =$   
258  $2.215$ ,  $p = 0.011$ ) for the distance to a single chunk (Fig. 5b), suggesting a greater drive

259 towards performing the sequence as a single chunk for the misaligned compared to the  
260 aligned chunked sequences over time. Together these results indicate that participants  
261 changed their chunking behavior for the misaligned instructions more quickly than for  
262 the aligned instructions.

263         Despite the divergence from the misaligned chunk structure with training,  
264 participants did not overcome the influence of the instruction completely. Even at the  
265 end of training, the sequences that were instructed with the aligned chunk structure  
266 showed a significantly smaller distance to the aligned chunk structure than to the  
267 misaligned chunk structure ( $t_{(31)} = 5.592, p < 1e-16$ ). This observation was also true for  
268 the sequences that were instructed with the misaligned chunk structure; the average  
269 distance between the participants' estimated chunk structure and the misaligned chunk  
270 structure was significantly smaller than to the aligned chunk structure ( $t_{(31)} = 6.962, p <$   
271  $1e-16$ ). This finding clearly shows that even the misaligned instructions had a lasting  
272 influence on the participants' motor behavior, even after three weeks of practice.

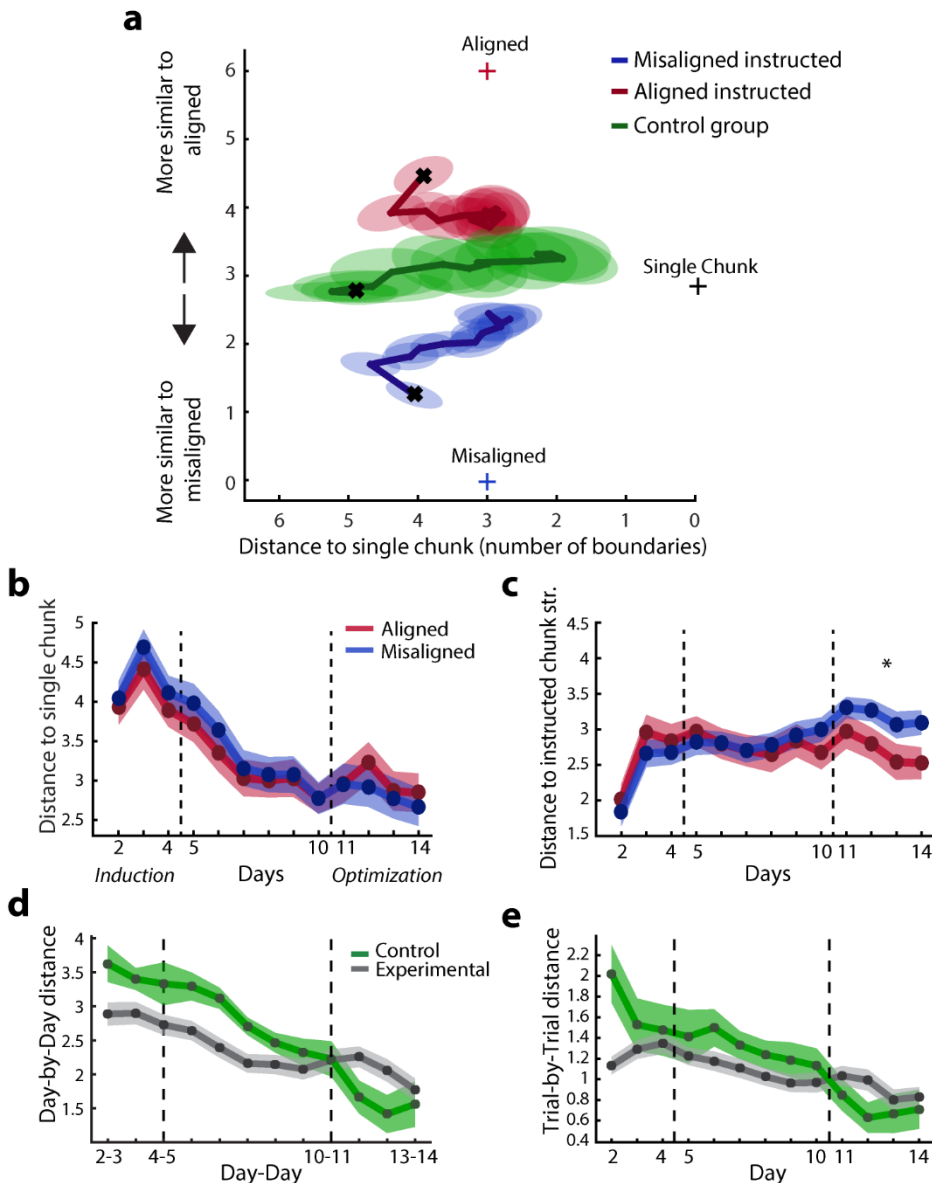

**Figure 5. Changes in chunk structure with learning.** (a) The average chunk structure over 13 days of practice for the two instructed chunk structures of the experimental groups and the control group. X-axis indicates the distance to the single-chunk structure, which counts the number of chunk boundaries. Y-axis represents how closely participants performed the sequence in accordance with the aligned or misaligned chunk structure. The “x” marks day 2. Ellipses denote the between-subject standard error. (b) Distance from a single chunk for aligned and misaligned instructed sequences across days. (c) Distance from the instructed chunk structure. (d) The distance between the average chunk structure between consecutive days. (e) The distance of chunk structures between consecutive trials of the same sequence within each day. Error bars indicate between-subject standard error.



## 273 **Chunk structure “crystallizes” with training**

274 Would longer training allow participants to completely overcome the influence of the  
275 instruction? Would they end up performing all sequences as a single chunk? Although  
276 experiments with longer training are necessary to provide a definitive answer, our data  
277 indicate that this process, if indeed occurring, may take a very long time. We observed  
278 that the amount of change in the chunk structure for each sequence reduced  
279 dramatically in the last week of training, suggesting that a stable motor habit formed.  
280 This phenomenon is akin to the development of an invariant temporal and spectral  
281 structure in bird-song learning, a process that has been termed “crystallization”<sup>40</sup>. To  
282 estimate crystallization, we calculated the distance between the chunk structures from  
283 one day to the next (Fig. 5d) and within each day from one trial to the next (Fig. 5e). The  
284 analysis was performed separately for each sequence and participant. Overall, the day-  
285 to-day distance decreased dramatically over time (effect of day in repeated  
286 measurement ANOVA:  $F_{(11,330)} = 18.794$ ,  $p < 1e-16$ ). The trial-by-trial change in chunk  
287 structure across days showed the same pattern ( $F_{(12,456)} = 13.245$ ,  $p < 1e-16$ ).  
288 Therefore, participants appeared to settle onto a stable pattern in the last four days of  
289 training. Consequently, additional training would likely only lead to very slow changes in  
290 their chunk structure.

291 In summary, our analysis provides a clearer picture of how chunking changes  
292 with learning. Firstly, in line with previous research<sup>25,28,32,37,38</sup> participants gradually  
293 moved towards performing the sequence as a single chunk by dividing the sequence  
294 into fewer chunks. Secondly, participants diverged from the instructions over time with a  
295 quicker deviation from the misaligned chunk structure. Nevertheless, they did not  
296 completely overcome the initial instruction, nor did they perform the sequences as a  
297 single chunk at the end of training. Considering that the chunk structure crystallized in  
298 the last four days of training, these results demonstrate the formation of a stable motor  
299 habit that is still influenced by the initial instruction.

## 300 **Spontaneously emerging chunk structures**

301 In addition to the two experimental groups, we also tested a control group (N=8) to  
302 investigate how participants would spontaneously chunk the sequences. The control

303 group did not receive any explicit chunk training in the induction phase. Rather,  
304 participants were presented with the entire 11-digit sequences on the first day and had  
305 to memorize them without any reference to chunks starting on the second day (see  
306 methods for details). In agreement with the experimental groups, the control group  
307 showed a tendency to subdivide the sequences into smaller chunks in the beginning  
308 and then slowly combine them into larger chunks. The distance to a single chunk  
309 structure decreased significantly over days (repeated measures ANOVA, effect of day:  
310  $F_{(12,84)} = 17.977$ ,  $p < 1e-16$ ), and reached a level that was statistically not different from  
311 the experimental participants on the last day of training ( $t_{(38)} = -0.940$ ,  $p = 0.353$ ).  
312 Interestingly, the control group performed the sequences on the first day closer to the  
313 misaligned chunk structure than to the aligned chunk structure ( $t_{(7)} = -2.799$ ,  $p = 0.027$ ).  
314 With training, however, participants moved closer to the aligned chunk structure, as  
315 indicated by a significant change in the difference between the distance to the aligned  
316 and misaligned chunk structure (repeated measures ANOVA,  $F_{(12,84)} = 5.303$ ,  $p < 1e-$   
317  $16$ ). The control group also showed clear crystallization over time. Compared to the  
318 experimental groups, control participants showed a higher day-to-day and trial-by-trial  
319 expected distance in the beginning of training, which then reduced more quickly (group  
320 x day interaction; day-to-day:  $F_{(11,330)} = 3.780$ ,  $p = 4.003e-05$ ; trial-by-trial:  $F_{(12,456)} =$   
321  $4.254$ ,  $p = 2.167e-06$ ). In summary, the control group showed similar behavioral  
322 patterns to the experimental participants, indicating that similar processes of habit  
323 formation are also at play in the absence of an explicit habit induction.

## 324 **Two optimization processes correlate with faster performance**

325 Having obtained a more complete picture of changes in chunking, we can now examine  
326 to what degree these changes helped the participants to improve their performance. We  
327 first asked whether performing the sequences closer to a single chunk would correlate  
328 with performance. Within each participant, we estimated the relationship between the  
329 MT of a specific sequence and the distance to the single chunk structure in the last four  
330 days of training. For each participant, we regressed the MT for 6 sequences (excluding  
331 the neutral sequence) against the average distance to the single chunk structure (Fig.  
332 6a). The majority of the participants showed a positive relationship between the number  
333 of chunks and MT: a one-sample t-test indicated that the individual slopes were

334 significantly greater than 0 (Fig. 6a,  $t_{(31)} = 6.104$ ,  $p = 4.560e-07$ ). This significant  
335 relationship was also found for the control participants (Fig. 6b,  $t_{(7)} = 3.429$ ,  $p = 0.006$ ).  
336 This finding provides clear evidence that performing the sequences with fewer chunks  
337 correlates with improved performance.

338         Secondly, we investigated whether performing the sequences in alignment with  
339 the biomechanical constraints would lead to fast performance. We regressed the MT for  
340 6 sequences (excluding the neutral sequence) against the average distance to the  
341 aligned chunk structure in the last four days of training. On average the individual  
342 slopes again were significantly greater than 0, both for the experimental (Fig. 6c;  $t_{(31)} =$   
343  $2.220$ ,  $p = 0.017$ ), and for the control group (Fig. 6d,  $t_{(7)} = 2.720$ ,  $p = 0.015$ ). These  
344 results suggest that finding a particularly good way of chunking (for the same number of  
345 chunk boundaries) also improves performance.

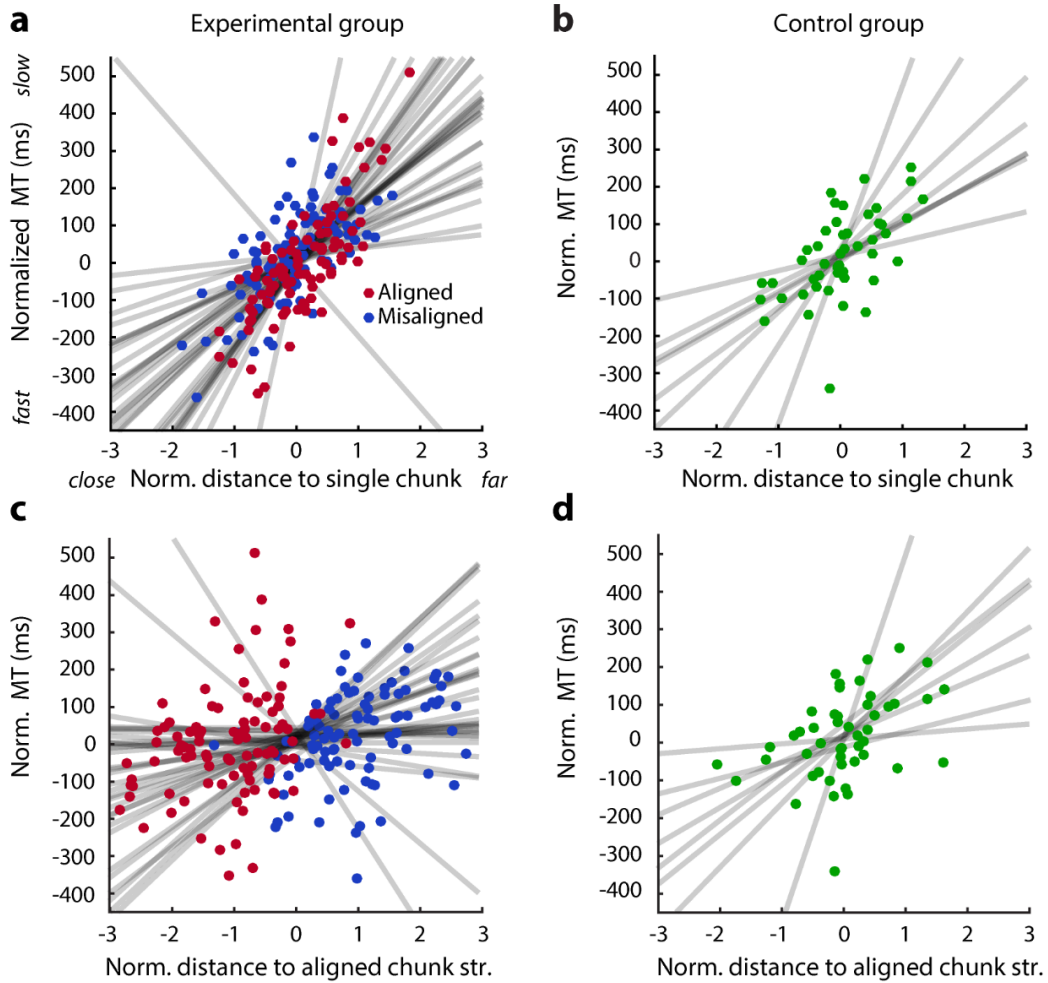

**Figure 6. Relationship between the distance to the aligned/single chunk structure and MT. (a)** Scatterplot between the normalized (per subj.) distance to a single chunk and normalized MT in the last four days of practice. A separate regression line is fitted to the 6 sequences for each subject. Red dots indicate sequences with aligned instructions, blue dots sequences with misaligned chunking instructions. **(b)** Same as a but for the control group. **(c&d)** same as a & b but for the normalized distance to the aligned chunk structure.

346 To visualize the relationship between the chosen chunk structure and the MT in  
347 the last four days of training, we plotted the MT and chunk structure for each sequence  
348 and participant in the 2-dimensional space defined in Fig. 5a (Fig. 7). The diameter of

349 each circle visually represents the value of the MT. This visualization clearly shows the  
350 performance benefit from being closer to a single chunk as well as being closer to the  
351 aligned chunk structure.

352 Overall, these results suggest that the two optimization processes - joining  
353 chunks and aligning the remaining chunk boundaries with biomechanical constraints -  
354 positively influence participants' speed with training. These analyses also showed that  
355 sequences for which participants could not develop a better way of chunking were  
356 performed substantially slower.

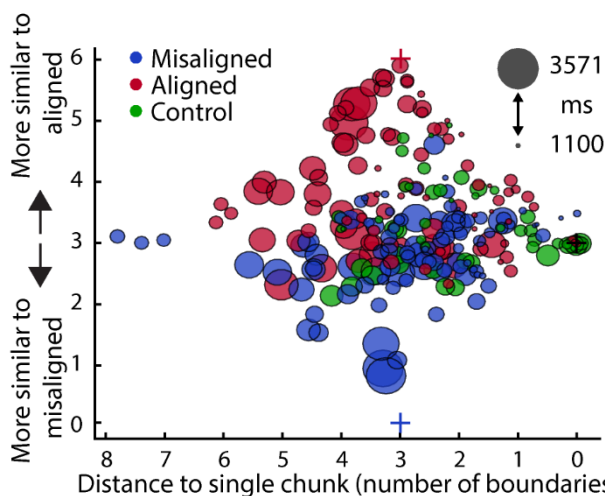

**Figure 7. Relationship between chunking and speed (days 11-14).** The x-axis indicates the distance to a single chunk and the y-axis the relative distance to the two instructed chunk structures. Each data point indicates the average chunk structure and MT of a single sequences and participant in the last four days of training. The diameter of each circle represents the MT with larger circles indicating slower performance.

## Discussion

357

358 Our study utilizes a novel experimental paradigm to investigate how motor habits are  
359 formed and how they may be overcome. We influenced the structure of the initial  
360 declarative memory representation of the sequences by manipulating how participants  
361 memorized them. By experimentally imposing two different chunk structures on the  
362 same physical sequence, we could make causal inferences on the effects of cognitive  
363 chunking on motor skill development. This is an important advance over previous  
364 observational studies<sup>28,32,41</sup>, which had no experimental control over how participants  
365 chose to chunk the sequence.

366 Our data demonstrate that stable motor habits can be induced through cognitive  
367 instruction and practice of these instructions during the initial phase of training. While  
368 participants diverged from the instruction over time, they did not completely overcome  
369 the initial chunk structure we imposed. Additionally, we found that participants' chunk  
370 structure crystallized over the course of training, making it unlikely that the influence of  
371 the initial instruction would disappear completely with longer training. Moreover, we  
372 found that the motor habit remained stable, even when we changed from a memory-  
373 guided to a stimulus-guided task. Thus, the initial instruction led to the formation of  
374 motor habits that changed over time but were still clearly present after three weeks of  
375 training.

376 Based on the independent measure of the speed of digit transitions, we designed  
377 two alternative ways of chunking: One that was aligned and one that was misaligned  
378 with the biomechanical difficulty of the transitions. Indeed, we could show that this  
379 manipulation influenced performance in the first two weeks of practice. This  
380 demonstrates that the structure of the declarative memory representation can either  
381 facilitate or impede performance.

382 Our results also indicated that this bad habit could be overcome through practice:  
383 Participants changed the misaligned chunk structure more rapidly than the aligned  
384 chunk structure, and on the group level the performance detriment imposed by the  
385 misaligned instruction was no longer significant in the last week of training. We

386 identified two ways by which participants overcame the limitation induced by the bad  
387 habit.

388 First, participants joined chunks together, decreasing the amount of additional  
389 time spent on chunk boundaries. While previous research has shown that the size of  
390 chunks increases with training, it is debated whether this tendency affects performance  
391 <sup>28,29,42,43</sup>. Using a Bayesian model that allowed us to assess chunk structure  
392 independent of performance, we could demonstrate a clear positive relationship  
393 between chunk concatenation and execution speed. This effect was not only seen in the  
394 experimental group, but also in the control group which developed a chunking strategy  
395 without explicit instructions. However, our results also indicate that participants did not  
396 merge the sequence into a single chunk after 3 weeks of training, but still subdivided  
397 each sequence into 3-4 chunks. This suggests that the length or duration of motor  
398 actions that can be joined and optimized as a single element may be limited<sup>32</sup>.

399 Given this constraint, participants also optimized performance by placing the  
400 necessary chunk boundaries in a biomechanical efficient manner. Consistent with our  
401 prediction based on the difficulty of individual digit transitions, placing chunk boundaries  
402 at digit transitions that take more time to execute resulted in faster performance for the  
403 full sequence. This optimization process was also observable in the control group that  
404 memorized and practiced sequences on their own terms.

405 Conversely, we observed that sequences that were not chunked in line with  
406 either of the two optimization strategies were performed slower. Therefore, if a more  
407 beneficial way of chunking was not found, participants still showed a clear detriment,  
408 suggesting that other learning mechanisms cannot fully make up for a persistent bad  
409 habit. Considering that participants' behavior became highly invariant in the last week of  
410 practice, we predict that some bad habit will remain and continue to influence  
411 participants' performance even after prolonged training.

412 In many motor tasks there are numerous possible strategies that can lead to  
413 excellent performance. Examining Figure 7, one can observe that the shortest MTs  
414 were achieved anywhere in the space between the aligned and single chunk structure.

415 Occasionally, good performance was also reached in other positions in chunk space.  
416 Participants adopted quite idiosyncratic chunk structures for each sequence at the end  
417 of training. This suggests that there may be some inter-individual variability in which  
418 technique works best for reaching a high level of performance. While we based our  
419 biomechanical constraint estimates on a representative sample, it might not perfectly  
420 reflect the constraints experienced by each participant. Alternatively, a number of ways  
421 of chunking may work approximately equally well, such that the cost of changing an  
422 established habit may outweigh the small benefit that could be gained from changing  
423 the structure. A similar observation can be made in sports, where even top-ranked  
424 athletes use slightly different techniques to reach similar performance levels. This  
425 variation may reflect individual biomechanical differences but also differences in  
426 instruction and training combined with subsequent habit formation.

427         While our experimental design enabled us to manipulate participants' habits in a  
428 laboratory setting, sequence learning only captures a specific aspect of motor skill  
429 acquisition. Nevertheless, similar persistence of habits has been observed in other  
430 motor learning paradigms<sup>45</sup>. In bimanual coordination, for instance, Park et al.<sup>46</sup> showed  
431 that acquired habits stayed remarkably stable even over 8 years of not performing the  
432 task.

433         The establishment of a novel experimental paradigm to study habit formation in  
434 skill learning is in itself important. In the future, it will allow us to explore how we can  
435 encourage learners to abandon or change a current habit. While our attempt at  
436 accelerating this process by changing the task from a memory-based to a stimulus-  
437 based task was ultimately not successful, there are many other techniques that would  
438 be possible. In many disciplines, teachers have developed ways to help students  
439 overcome bad habits. For instance, the Hanon exercise is a piano technique to help  
440 students play difficult passages of a musical piece by breaking up the learned musical  
441 piece into new chunks to explore different rhythms. Playing a passage slower than  
442 intended has also been suggested to break bad habits<sup>47</sup>. Overall, a clear message from  
443 the diverse literature on learning piano is to diversify training and to practice with  
444 diligence to prevent injury and bad habits from forming<sup>48</sup>. This suggests that changes in



445 context and providing students with new ways of exploring their skill might aid  
446 performance and the abandonment of bad habits.

447 The current study yields new insights into how habits are formed during motor  
448 skill learning and how the nature of the habit influences its stability. Furthermore, we  
449 obtained insight into the optimization processes that are involved in overcoming a  
450 detrimental habit. Our novel experimental paradigm now allows the further study of how  
451 we can aid the abandonment of bad habits.

## 452 **Methods**

### 453 **Participants**

454 Forty neurologically healthy participants were recruited for the study (30 females; ages:  
455 19 to 33). Thirty-two were randomly split into two experimental groups and the  
456 remaining eight participants were assigned to the control group. All participants were  
457 right-handed based on the Edinburgh Handedness Inventory and completed informed  
458 consent. On average, participants had received 4.68 ( $\pm$  5.55) years of musical training,  
459 with 55% percent having played the piano for more than half a year. While the amount  
460 of musical training positively influenced performance speed, it did not affect chunk  
461 behavior. The study protocol was approved by the ethics board of the University of  
462 Western Ontario.

### 463 **Apparatus**

464 A custom-built five-finger keyboard was used. The keys were not depressible, but were  
465 equipped with a force transducer (FSG-15N1A, Sensing and Control, Honeywell)  
466 underneath each key which reliably measured participants' isometric force production  
467 with a repeatability of  $<0.02\text{N}$  and a dynamic range of  $16\text{N}$ <sup>49-51</sup>. The signal was  
468 amplified and sampled at 200 Hz.

### 469 **Discrete sequence production task**

470 We used a discrete sequence production task (DSP), in which participants had to  
471 execute sequences of 2, 3, or 11 keypresses as fast as possible while keeping their  
472 error rate under 15% within each block. A trial was termed erroneous if participants  
473 pressed a wrong key anywhere within the sequence. No pause between presses was

474 required and thus some co-articulation between fingers emerged with faster execution.  
475 A finger press was detected when the produced force of a given finger crossed a  
476 threshold of 3N. Subsequently, a finger was detected as released when the force of the  
477 same finger fell below 1.5N. In order for a subsequent finger to be registered as pressed  
478 the previous finger had to be released. This rule prevented participants to press with  
479 more than 2 fingers at once. The force magnitude applied to each key was represented  
480 by 5 lines on an LCD monitor, with the height of the line representing the force in the  
481 corresponding finger. A white asterisk (memory-guided conditions) or digits (cued  
482 condition) for each finger press was presented above the lines. Immediately after the  
483 press threshold was reached, participants received visually and auditory feedback. If the  
484 press was correct, the white cue changed its color to green and a sound was presented.  
485 If the press was incorrect, the cue turned red and a lower-pitch sound was presented.  
486 After each trial, participants received points based on their performance. Correct  
487 sequences that were performed faster than the movement time (MT) threshold were  
488 rewarded with 1 point. MTs that were 20% faster than the threshold were rewarded with  
489 3 points. Incorrect presses or MTs exceeding the threshold resulted in 0 points. At the  
490 end of each block, participants received feedback on their error rate, median MT, points  
491 obtained during the block, and total points obtained during the session. In order to  
492 maintain motivation, we adjusted the MT threshold necessary to obtain points. After  
493 each block, we lowered the threshold by 500ms if participants performed with an error  
494 rate of 15% or lower and had a median MT faster than the current threshold.

## 495 **Study design**

496 To impose a particular way of chunking onto participants' behavior, we first had  
497 participants memorize and perform smaller 2-3 press chunks. These chunks were then  
498 combined to form the training sequences. All participants were trained on the same 7  
499 sequences, each consisting of 11 digit presses (see suppl. Table 1). Each participant  
500 completed 15 training sessions in total: one session per day across a 3-week period  
501 (excluding weekends). Each session lasted approximately 1 hour, excluding the two  
502 initial sessions and the last session which took 2 hours.

503 To be able to verify that the chunking behavior was influenced by our instruction,  
504 we used two different ways of chunking. We split each sequence either into one 2-digit  
505 and three 3-digit chunks (2-3-3-3, misaligned) or into three 3-digit chunks and one 2-  
506 digit chunk (3-3-3-2, aligned). Each participant practiced half of the sequences with one  
507 chunk structure and the other half of the sequences with the other chunk structure. This  
508 resulted in two groups of participants, which received training in two different sets of  
509 chunks (suppl. Table 2). The control group did not receive any explicit chunking  
510 instructions.

511 *Days 1-4: Chunk induction & initial sequence learning*

512 Experimental group: At the beginning of training the experimental groups were pre-  
513 trained on a specific set of eleven 2- or 3-digit chunks (2 two-press chunks and 9 three-  
514 press chunks). Participants received one of two different sets of chunks (suppl. Table  
515 2). Each chunk was consistently associated with a letter of the alphabet (A-K).  
516 Participants were explicitly told to learn this association. Each chunk was presented  
517 twice in succession. In half of the blocks, on the first trial of each chunk presentation,  
518 the numbers corresponding to the finger presses accompanied the letter on the screen  
519 while on the second trial participants had to recall the presses solely based on the letter  
520 (numbers were interchanged with stars). This trial order was reversed on every second  
521 block. To ensure that participants had memorized the chunks we added speeded recall  
522 blocks at the end of days 1 and 2. After practicing the 2-3 press chunks on day 1 and at  
523 the beginning of day 2, participants trained on the seven 11-press sequences. Each  
524 sequence was associated with a symbol (e.g. \$; suppl. Table 1). Each sequence was  
525 presented twice in succession and participant had to perform the sequences from  
526 memory using the sequence cue on one trial or with the help of the chunk letters on the  
527 next trial. We tested participants' sequence knowledge with a self-paced recall block at  
528 the end of days 2-4.

529 Control group: The control group did not receive any chunk pre-training but trained  
530 directly on the seven 11-press sequences. On the first day, the control participants  
531 practiced the sequences using the digits presented on the screen. We matched the  
532 amount of training across groups by ensuring that all participants were required to

533 produce the same number of finger presses. On the first day, the control participants  
534 were not aware that they would have to memorize the sequences later on. On days 2-4  
535 they then were instructed to memorize the sequences using the same sequence cues  
536 as the experimental groups and were subsequently tested on their sequence  
537 knowledge. The rest of the experimental design was identical for all groups.

#### 538 *Days 5-10: Memory Recall*

539 For the days 5-10 of training participants practiced exclusively on the entire eleven-  
540 press sequences and chunks were no longer mentioned or trained on. Each sequence  
541 was presented twice in succession and participants had to recall the sequence from  
542 memory on both trials using the sequence cue.

#### 543 *Days 11-14: Memory recall or cued presentation*

544 During the last four days of training, half of the experimental participants performed the  
545 sequences from memory while for the other half and for the control participants we  
546 removed the sequence cue and presented participants with the actual numbers that  
547 corresponded to the sequences (Fig. 1a). Participants completed an additional  
548 generalization test on day 15. The results of this test is not reported in this article.

#### 549 *Aligned vs. misaligned chunk structures*

550 To determine how to design our sequences and chunk structures to aid or impede  
551 performance we needed to estimate the biomechanical difficulty of performing all  
552 possible two and three finger transitions on our device. We trained a separate set of 7  
553 participants for 3 days to perform each possible combination of 2 and 3 digit transitions  
554 (e.g. 12 or 123). The required digit combination was presented on the screen, and  
555 participants were instructed to execute the presses as fast as possible while trying to  
556 keep their error rate below 15% in each block.

557         Among all possible 2-digit transitions, finger repetitions (e.g. 11) were executed  
558 the slowest while transitions between neighboring fingers (e.g. 12) were especially fast  
559 (Fig. 1b). Using these results, we designed the sequences such that they would include  
560 both fast transitions (runs e.g. 123) and slow finger repetitions (113; suppl. Table 1).  
561 Depending on which chunk structure was instructed, these transitions would either fall

562 on a chunk boundary or lie within a chunk. We counterbalanced this within and between  
563 participants, meaning that each participant trained on 3 sequences with the aligned  
564 chunk structure and 3 with the misaligned chunk structure (suppl. Table 1). One control  
565 sequence was added which included a within-chunk run for both groups.

## 566 **Statistical Analysis**

567 We recorded and analyzed the force traces for each of the fingers. For each trial, we  
568 calculated the reaction time (RT, time between presentation and first crossing of the  
569 threshold), movement time (MT, time between first press and last release) and inter-  
570 press-intervals (IPIs; time between force peaks of two consecutive presses). All  
571 analyses were performed using custom-written code for MATLAB (the MathWorks). We  
572 excluded trials that contained one or more incorrect presses from our analyses, as well  
573 as trials with an MT or a press with an IPI that was three standard deviations above the  
574 mean. The data were analyzed using mixed-effects analysis of variance (mixed  
575 ANOVA), Pearson's correlation and paired and one sample t-tests. All t-tests were two-  
576 sided. A probability threshold of  $p < 0.05$  for the rejection of the null hypothesis was used  
577 for all statistical tests. For the regression analyses as well as for calculating the MT  
578 difference between the sequences with misaligned and aligned instruction we  
579 normalized the data for each participant by subtracting the mean performance for each  
580 day due to a wide range of performance speeds.

### 581 *Probabilistic model for estimating chunk structure*

582 We used an extended version of a Bayesian model of chunking behavior,  
583 developed by Acuna et al.<sup>34</sup>. The algorithm uses a Hidden Markov Model to estimate the  
584 posterior probability that a specific chunk structure is active on a given trial. As we had  
585 10 digit transitions, each of which could either coincide with a chunk boundary or not,  
586 we had to consider  $2^{10}-1=1023$  possible chunk structures. Between trials, the hidden  
587 Markov process could either stay in the same chunk structure with probability  $p$  or jump  
588 to any other chunk structure with probability  $(1-p)/1022$ . The IPIs were modeled as a  
589 Gaussian random variable, with a different mean and variance, depending on whether  
590 the transition was within- or between-chunks. In contrast to Acuna et al.<sup>34</sup>, where  
591 learning effects were removed in a preprocessing step using a single exponential, we

592 modeled the learning within our model with two separate exponentials for the IPI mean.  
593 This captured the faster reduction in the between- compared to the within-chunk  
594 intervals (Fig. 2a). The inclusion of separate learning curves for within- and between-  
595 chunk IPIs into the model allowed us to estimate participants' chunk structure  
596 independently of the overall performance speed. This is an important advance over  
597 previous methods that used a constant cutoff value to distinguish between within- and  
598 between chunk intervals. For these methods, faster performance would automatically  
599 decrease the number of chunk boundaries detected. To confirm that our algorithm did  
600 not show this bias, we simulated artificial data using parameter estimates for individual  
601 participants. We simulated sequences that switched between 4 different chunk  
602 structures, each of which contained 4 chunks. Even though IPIs decreased by about  
603 300ms with learning, the estimated average number of chunks remained stable across  
604 the entire simulated experiment (average distance to single chunk: 3.35).

605 The model did not use errors and IPIs covariance structure, as these did not  
606 relate systematically to the imposed chunk structure even early in training. We used an  
607 Expectation-Maximization algorithm to simultaneously estimate the posterior probability  
608 of each chunk structure for each trial, as well as the 9 parameters of the model: 3  
609 parameters each for the exponential curve for the within- and between chunk IPIs, 1  
610 variance parameter for each, and the transition probability  $p$ .

611 As a preprocessing step, we regressed the IPIs for each subject against the  
612 average biomechanical profile, which was estimated as the average IPI profile for all  
613 possible 2 digit-presses from our pilot experiment (Fig. 1b). The fitted values were  
614 removed from the IPIs. Removing temporal regularities that could be modeled with  
615 biomechanics alone should result in chunking estimates that more closely reflect  
616 cognitive and learning influences. Qualitatively comparable results were also obtained  
617 using the raw IPIs, without biomechanical factors removed.

### 618 *Expected distance*

619 We quantified how much participants changed their chunking behavior over time by  
620 calculating the expected distance between two estimated chunk structures. The  
621 distance between two chunk structures,  $d(i,j)$ , was defined as how many of the 10

622 transitions would have to change from a chunk boundary to a non-boundary (and vice  
623 versa) to transform one structure into the other (for an example, see Fig. 4b). A distance  
624 of 0 would indicate no change and the average distance between two randomly chosen  
625 chunk structures is 6. Because we could not be 100% certain which chunk structure  
626 participants adopted in each trial, we calculated the expected distance. For this, we first  
627 calculated a 1023 X 1023 matrix containing the distances between any chunk structure  
628  $i$ , and chunk structure  $j$ . From the posterior probability distribution, we could then derive  
629 how likely each of these chunk structure changes was,  $p(i,j)$ . The expected value of the  
630 distance was then simply calculated as

$$631 \quad E(d) = \sum_{i=1}^{1023} \sum_{j=1}^{1023} p(i,j)d(i,j).$$

#### 632 *Code availability*

633 Bayesian algorithm code available on GitHub:

634 [https://github.com/jdiedrichsen/chunk\\_inference](https://github.com/jdiedrichsen/chunk_inference).

635 Custom MATLAB code is available from the corresponding author on reasonable  
636 request.

#### 637 *Data availability*

638 The datasets generated during and analyzed during the current study are available from  
639 the corresponding author on reasonable request.

**Supplementary Table 1. Sequences and chunk structures for the two experimental groups.**

Displayed are the 7 sequences used together with the associated sequence cue. The black vertical lines indicate the chunk boundaries that were imposed. Chunk structures were either aligned with the biomechanical requirements (red) or misaligned (blue). The last sequence (green) was included as a control sequence that was chunked either with a 3-3-3-2 or 2-3-3-3 structure but performance wise should lead to similar speeds as for both chunk structures the boundaries were placed at biomechanically slow transitions. This sequence was not included in the analyses.

| Sequence                | Group 1               | Group 2               |
|-------------------------|-----------------------|-----------------------|
| ?                       | 1 2 3 5 1 3 3 2 1 3 4 | 1 2 3 5 1 3 3 2 1 3 4 |
| +                       | 4 3 5 5 1 2 3 5 3 3 2 | 4 3 5 5 1 2 3 5 3 3 2 |
| %                       | 4 3 5 5 1 2 3 5 3 3 2 | 4 3 5 5 1 2 3 5 3 3 2 |
| \$                      | 3 2 1 1 3 5 1 2 3 4 3 | 3 2 1 1 3 5 1 2 3 4 3 |
| &                       | 3 2 1 1 3 5 1 3 4 4 3 | 3 2 1 1 3 5 1 3 4 4 3 |
| @                       | 3 4 1 1 3 5 1 3 4 4 3 | 3 4 1 1 3 5 1 3 4 4 3 |
| #<br>(control sequence) | 3 4 1 2 3 5 1 2 3 4 3 | 3 4 1 2 3 5 1 2 3 4 3 |

|Chunk Boundary — Aligned — Misaligned



**Supplementary Table 2. Instructed chunks and sequences for the two experimental groups.** The tables depict the finger presses (1-5) that were associated with the chunk cues (A-K) and the chunks that were associated with the sequences cues (symbols).

| Chunks Group 1 |         |   | Chunks Group 2 |         |   |   |   |
|----------------|---------|---|----------------|---------|---|---|---|
| Chunk          | Presses |   | Chunk          | Presses |   |   |   |
| A              | 3       | 2 | A              | 1       | 2 |   |   |
| B              | 3       | 4 | B              | 4       | 3 |   |   |
| C              | 1       | 1 | 3              | C       | 1 | 2 | 3 |
| D              | 1       | 2 | 3              | D       | 1 | 3 | 4 |
| E              | 3       | 2 | 1              | E       | 1 | 3 | 5 |
| F              | 3       | 4 | 3              | F       | 2 | 3 | 5 |
| G              | 3       | 5 | 3              | G       | 3 | 2 | 1 |
| H              | 4       | 3 | 5              | H       | 3 | 3 | 2 |
| I              | 4       | 4 | 3              | I       | 3 | 4 | 1 |
| J              | 5       | 1 | 2              | J       | 3 | 5 | 1 |
| K              | 5       | 1 | 3              | K       | 5 | 5 | 1 |

| Sequences Group 1 |        |   |   |   | Sequences Group 2 |        |   |   |   |
|-------------------|--------|---|---|---|-------------------|--------|---|---|---|
| Seq.              | Chunks |   |   |   | Seq.              | Chunks |   |   |   |
| ?                 | D      | K | E | B | ?                 | A      | J | H | D |
| +                 | H      | K | E | B | +                 | B      | K | H | D |
| %                 | H      | J | G | A | %                 | B      | K | F | H |
| \$                | A      | C | J | F | \$                | G      | E | C | B |
| &                 | A      | C | K | I | &                 | G      | E | D | B |
| @                 | B      | C | K | I | @                 | I      | E | D | B |
| #                 | B      | D | J | F | #                 | I      | F | C | B |

640

References

- 641 1. Ericsson, K. A. *et al.* The role of deliberate practice in the acquisition of expert  
642 performance. *Psychol. Rev.* **100**, 363–406 (1993).
- 643 2. Hayes, J. R. *The Complete Problem Solver.* (Taylor & Francis, 2013).
- 644 3. Haith, A. M. & Krakauer, J. W. The multiple effects of practice: skill, habit and reduced  
645 cognitive load. *Curr. Opin. Behav. Sci.* **20**, 196–201 (2018).
- 646 4. Hélie, S., Waldschmidt, J. G. & Ashby, F. G. Automaticity in rule-based and information-

- 647 integration categorization. *Attention, Perception, Psychophys.* **72**, 1013–1031 (2010).
- 648 5. Hardwick, R. M., Forrence, A. D., Krakauer, J. W. & Haith, A. M. Skill Acquisition and Habit  
649 Formation as Distinct Effects of Practice. *bioRxiv* (2017). doi:10.1101/201095
- 650 6. Ashby, F. G., Ell, S. W. & Waldron, E. M. Procedural learning in perceptual categorization.  
651 *Mem. Cogn.* **31**, 1114–1125 (2003).
- 652 7. Jager, W. Breaking ‘ bad habits ’: a dynamical perspective on habit. *Hum. Decis. Mak.*  
653 *Environ. Perception. Underst. Assist. Hum. Decis. Mak. Real-life Settings. Lib. Americum*  
654 *Charles Vlek.* 149–160 (2003).
- 655 8. Graybiel, A. M. Habits, rituals, and the evaluative brain. *Annu. Rev. Neurosci.* **31**, 359–387  
656 (2008).
- 657 9. Robbins, T. W. & Costa, R. M. Habits. *Curr. Biol.* **27**, R1200–R1206 (2017).
- 658 10. Seger, C. A. & Spiering, B. J. A critical review of habit learning and the Basal Ganglia.  
659 *Front. Syst. Neurosci.* **5**, 1–9 (2011).
- 660 11. Dezfouli, A. & Balleine, B. W. Habits, action sequences and reinforcement learning. *Eur. J.*  
661 *Neurosci.* **35**, 1036–1051 (2012).
- 662 12. Dolan, R. J. & Dayan, P. Goals and habits in the brain. *Neuron* **80**, 312–325 (2013).
- 663 13. Smith, K. S. & Graybiel, A. M. Using optogenetics to study habits. *Brain Res.* **1511**, 102–  
664 114 (2013).
- 665 14. Graybiel, A. M. & Grafton, S. T. The Striatum: Where Skills and Habits Meet. *Cold Spring*  
666 *Harb. Perspect. Biol.* **7**, a021691 (2015).
- 667 15. Moors, A. & De Houwer, J. Automaticity: A theoretical and conceptual analysis. *Psychol.*  
668 *Bull.* **132**, 297–326 (2006).
- 669 16. Hélie, S. & Cousineau, D. The cognitive neuroscience of automaticity: Behavioral and  
670 brain signatures. *Cogn. Sci. Hauppauge* **6**, 35–53 (2011).

- 671 17. Abrahamse, E. L., Ruitenberg, M. F. L., de Kleine, E. & Verwey, W. B. Control of  
672 automated behavior: insights from the discrete sequence production task. *Front. Hum.*  
673 *Neurosci.* **7**, 1–16 (2013).
- 674 18. Verwey, W. B. Concatenating familiar movement sequences: The versatile cognitive  
675 processor. *Acta Psychol. (Amst)*. **106**, 69–95 (2001).
- 676 19. Diedrichsen, J. & Kornysheva, K. Motor skill learning between selection and execution.  
677 *Trends Cogn. Sci.* **19**, 227–233 (2015).
- 678 20. Wong, A. L., Lindquist, M. A., Haith, A. M. & Krakauer, J. W. Explicit knowledge enhances  
679 motor vigor and performance: motivation versus practice in sequence tasks. *J.*  
680 *Neurophysiol.* **114**, 219–232 (2015).
- 681 21. Kleine, E. De & Verwey, W. B. Representations underlying skill in the discrete sequence  
682 production task: effect of hand used and hand position. *Psychol. Res. Psychol. Forsch.* **73**,  
683 685–694 (2009).
- 684 22. Verwey, W. B. & Dronkert, Y. Practicing a Structured Continuous Key-Pressing Task:  
685 Motor Chunking or Rhythm Consolidation? *J. Mot. Behav.* **28**, 71–79 (1996).
- 686 23. Verwey, W. B., Abrahamse, E. L. & Jiménez, L. Segmentation of short keying sequences  
687 does not spontaneously transfer to other sequences. *Hum. Mov. Sci.* **28**, 348–361 (2009).
- 688 24. Verwey, Verwey, W. B., Abrahamse, E. L. & de Kleine, E. Cognitive processing in new and  
689 practiced discrete keying sequences. *Front. Psychol.* **1**, 32 (2010).
- 690 25. Verwey, W. B. Buffer loading and chunking in sequential keypressing. *J. Exp. Psychol.*  
691 *Hum. Percept. Perform.* **22**, 544–562 (1996).
- 692 26. Miller, G. A. The magical number seven, plus or minus two: some limits on our capacity  
693 for processing information. *Psychol. Rev.* **63**, 81–97 (1956).
- 694 27. Halford, G. S., Wilson, W. H. & Phillips, S. Processing capacity defined by relational  
695 complexity: implications for comparative, developmental, and cognitive psychology.

- 696 *Behav. Brain Sci.* **21**, 803–864 (1998).
- 697 28. Wymbs, N. F. F., Bassett, D. S. S., Mucha, P. J. J., Porter, M. A. A. & Grafton, S. T. T.  
698 Differential Recruitment of the Sensorimotor Putamen and Frontoparietal Cortex during  
699 Motor Chunking in Humans. *Neuron* **74**, 936–946 (2012).
- 700 29. Solopchuk, O., Alamia, A., Olivier, E., Ze, A. & Zénon, A. Chunking improves symbolic  
701 sequence processing and relies on working memory gating mechanisms. *Learn. Mem.* **23**,  
702 108–112 (2016).
- 703 30. Bo, J. & Seidler, R. D. Visuospatial working memory capacity predicts the organization of  
704 acquired explicit motor sequences. *J. Neurophysiol.* **101**, 3116–3125 (2009).
- 705 31. Seidler, R. D., Bo, J. & Anguera, J. A. Neurocognitive contributions to motor skill learning:  
706 The role of working memory. *J. Mot. Behav.* **44**, 445–453 (2012).
- 707 32. Ramkumar, P. *et al.* Chunking as the result of an efficiency computation trade-off. *Nat.*  
708 *Commun.* **7**, 12176 (2016).
- 709 33. Verwey, W. B. Evidence for a multistage model of practice in a sequential movement  
710 task. *J. Exp. Psychol. Hum. Percept. Perform.* **25**, 1693–1708 (1999).
- 711 34. Acuna, D. E. *et al.* Multifaceted aspects of chunking enable robust algorithms. *J.*  
712 *Neurophysiol.* **112**, 1849–1856 (2014).
- 713 35. Welch, L. R. Hidden Markov Models and the Baum-Welch Algorithm. *IEEE Inf. Theory Soc.*  
714 *News.* **53**, 1,10-13 (2003).
- 715 36. Dempster, A. P., Laird, N. M. & Rubin, D. B. Maximum likelihood from incomplete data  
716 via the EM algorithm. *J. R. Stat. Soc. Ser. B Methodol.* **39**, 1–38 (1977).
- 717 37. Sakai, K., Kitaguchi, K. & Hikosaka, O. Chunking during human visuomotor sequence  
718 learning. *Exp. Brain Res.* **152**, 229–242 (2003).
- 719 38. Kuriyama, K., Stickgold, R. & Walker, M. P. Sleep-dependent learning and motor-skill

- 720 complexity. *Learn. Mem.* **11**, 705–713 (2004).
- 721 39. Bassett, D. S. *et al.* Dynamic reconfiguration of human brain networks during learning.  
722 *Proc. Natl. Acad. Sci.* **108**, 7641–7646 (2011).
- 723 40. Brainard, M. S. & Doupe, A. J. What songbirds teach us about learning. *Nature* **417**, 351–  
724 358 (2002).
- 725 41. Wright, D. L., Rhee, J.-H. J.-H. H., Vaculin, A., Rhee, J.-H. J.-H. H. & Vaculin, A. Offline  
726 improvement during motor sequence learning is not restricted to developing motor  
727 chunks. *J. Mot. Behav.* **42**, 317–324 (2010).
- 728 42. Song, S. & Cohen, L. Impact of conscious intent on chunking during motor learning.  
729 *Learn. Mem.* **21**, 449–51 (2014).
- 730 43. Verstynen, T. *et al.* Dynamic Sensorimotor Planning during Long-Term Sequence  
731 Learning: The Role of Variability, Response Chunking and Planning Errors. *PLoS One* **7**,  
732 e47336 (2012).
- 733 44. Jiménez, L. Taking patterns for chunks: Is there any evidence of chunk learning in  
734 continuous serial reaction-time tasks? *Psychol. Res.* **72**, 387–396 (2008).
- 735 45. Diedrichsen, J., White, O., Newman, D. & Lally, N. Use-Dependent and Error-Based  
736 Learning of Motor Behaviors. *J. Neurosci.* **30**, 5159–5166 (2010).
- 737 46. Park, S.-W., Dijkstra, T. M. H. & Sternad, D. Learning to never forget—time scales and  
738 specificity of long-term memory of a motor skill. *Front. Comput. Neurosci.* **7**, 1–13 (2013).
- 739 47. Chang, C. C. *Fundamentals of Piano Practice*. Brain (CreateSpace Independent Publishing  
740 Platform, 2004).
- 741 48. Sadnicka, A., Kornysheva, K., Rothwell, J. C. & Edwards, M. J. A unifying motor control  
742 framework for task-specific dystonia. *Nat. Rev. Neurol.* **14**, 116–124 (2018).
- 743 49. Wiestler, T. & Diedrichsen, J. Skill learning strengthens cortical representations of motor

- 744 sequences. *Elife* **2**, 1–20 (2013).
- 745 50. Wiestler, T., Waters-Metenier, S. & Diedrichsen, J. Effector-Independent Motor Sequence  
746 Representations Exist in Extrinsic and Intrinsic Reference Frames. *J. Neurosci.* **34**, 5054–  
747 5064 (2014).
- 748 51. Yokoi, A. *et al.* Restricted transfer of learning between unimanual and bimanual finger  
749 sequences. *J. Neurophysiol.* **117**, 1043–1051 (2017).
- 750
